# Supplementary material
Source: PubMed Central journal article supplement (PMC1559808)
Supplement: rspb20043032s05.pdf [file rspb20043032s05.pdf]

# **ELECTRONIC APPENDIX**

This is the Electronic Appendix to the article

Directionality theory: an empirical study of  
an entropic principle in life history evolution

by

Martin Ziehe and Lloyd Demetrius

*Proc. R. Soc. B* (doi:10.1098/rspb.2004.3032)

Electronic appendices are refereed with the text; however, no attempt is made  
to impose a uniform editorial style on the electronic appendices.

# Electronic Appendix

## Legends

Table 3: Demographic parameters: growth rate  $r$ , reproductive potential  $\phi$ , entropy rate  $H$ , average net reproduction rate  $E$ , entropy function  $S$ , generation time  $T$ , maximum life span  $L_{max}$  (years). o = herbs from disturbed habitats, f = forest herbs, t = trees, s = shrubs

Table 3a: Species with  $E < 0$

Table 3b: Species with  $E > 0$

Figure 5: Relation between  $E$  and  $S$ : forest herbs (f)

Figure 6: Relation between  $E$  and  $S$ : herbs from disturbed habitats (o)

Figure 7: Relation between  $E$  and  $S$ : shrubs (s)

Figure 8: Relation between  $E$  and  $S$ : trees (t)

Table 3: Demographic parameters: growth rate  $r$ , reproductive potential  $\phi$ , entropy rate  $H$ , average net reproduction rate  $E$ , entropy function  $S$ , generation time  $T$ , maximum lifespan  $L_{max}$  (years). o = herbs from disturbed habitats, f = forest herbs, t = trees, s = shrubs

Table 3a: Species with  $E < 0$

| Species                   | Life form | $E$    | $S$   | $T$  |
|---------------------------|-----------|--------|-------|------|
| Tolumnia variegata        | f         | -5.249 | 2.679 | 10.0 |
| Chamaelirium luteum       | f         | -4.125 | 3.816 | 28.5 |
| Narcissus pseudonarcissus | f         | -3.102 | 2.538 | 7.2  |
| Cypripedium acaule        | f         | -3.027 | 2.969 | 14.6 |
| Panax quinquefolium       | f         | -2.541 | 3.033 | 13.0 |
| Erythronium japonicum     | f         | -2.271 | 2.321 | 4.7  |
| Cynoglossum virginianum   | f         | -2.025 | 2.293 | 5.9  |
| Disporum sessile          | f         | -1.969 | 1.943 | 3.3  |
| Calochortus pulchella     | f         | -1.958 | 2.716 | 8.5  |
| Arisaema triphyllum       | f         | -1.822 | 2.631 | 5.8  |
| Clintonia borealis        | f         | -1.770 | 2.410 | 5.0  |
| Podophyllum peltatum      | f         | -1.742 | 2.368 | 5.3  |
| Disporum smilacinum       | f         | -0.740 | 1.963 | 3.4  |
| Calathea ovandensis       | f         | -0.136 | 1.785 | 3.8  |
|                           |           |        |       |      |
| Ranunculus repens         | o         | -7.496 | 1.593 | 5.5  |
| Themeda triandra          | o         | -3.684 | 3.594 | 15.6 |
| Calochortus obispoensis   | o         | -3.511 | 3.960 | 21.6 |
| Heteropogon contortus     | o         | -3.282 | 2.935 | 9.3  |
| Hieracium floribundum     | o         | -3.147 | 2.938 | 9.2  |
| Setaria incrassata        | o         | -3.010 | 2.559 | 6.6  |
| Pinguicula alpina         | o         | -2.899 | 3.388 | 16.1 |
| Potentilla anserina       | o         | -2.819 | 2.019 | 4.5  |
| Fritillaria meleagris     | o         | -2.809 | 2.861 | 8.8  |
| Pedicularis furbishiae    | o         | -2.598 | 2.413 | 6.7  |
| Pinguicula villosa        | o         | -2.286 | 2.222 | 6.1  |
| Bothriochloa insculpta    | o         | -2.213 | 2.616 | 7.7  |
| Scabiosa columbaria       | o         | -2.083 | 2.178 | 5.9  |
| Pinguicula vulgaris       | o         | -2.067 | 3.156 | 13.4 |
| Cleome droserifolia       | o         | -1.811 | 3.412 | 16.6 |
| Aristida bipartita        | o         | -1.495 | 2.359 | 5.4  |
| Calochortus tiburonensis  | o         | -1.424 | 3.212 | 12.3 |
| Digitaria eriantha        | o         | -1.316 | 2.178 | 4.6  |
| Danthonia sericea         | o         | -1.282 | 2.925 | 9.2  |
| Ophrys sphegodes          | o         | -1.215 | 1.222 | 2.9  |
| Andropogon semiberberis   | o         | -1.138 | 1.912 | 3.6  |
| Gentiana pneumonanthe     | o         | -0.854 | 2.105 | 5.7  |
| Plantago coronopus        | o         | -0.488 | 0.796 | 2.4  |
| Anthyllis vulneraria      | o         | -0.145 | 1.099 | 2.7  |
| Ranunculus acris          | o         | -0.122 | 0.987 | 2.5  |
|                           |           |        |       |      |
| Lindera benzoin           | s         | -3.704 | 3.979 | 24.6 |

|                        |   |        |       |       |
|------------------------|---|--------|-------|-------|
| Podococcus barteri     | s | -3.309 | 3.430 | 19.0  |
| Alnus incana           | s | -3.566 | 2.912 | 12.9  |
| Fumana procumbens      | s | -2.707 | 2.716 | 9.8   |
| Betula nana            | s | -2.656 | 2.431 | 5.7   |
| Cassia nemophila       | s | -1.038 | 3.119 | 12.0  |
| Araucaria hunsteinii   | t | -7.342 | 5.007 | 120.0 |
| Pinus palustris        | t | -5.880 | 5.257 | 141.5 |
| Psidium guajava        | t | -7.087 | 5.061 | 112.0 |
| Euterpe precatorea     | t | -7.084 | 3.957 | 87.1  |
| Rhopalostylis sapida   | t | -4.551 | 5.239 | 112.2 |
| Nothofagus fusca       | t | -4.847 | 5.372 | 103.0 |
| Pentaclethra macroloba | t | -4.703 | 4.607 | 93.5  |
| Araucaria cunninghamii | t | -3.305 | 5.142 | 103.3 |
| Astrocaryum mexicanum  | t | -4.137 | 4.531 | 80.6  |
| Vatica hainanensis     | t | -4.084 | 3.909 | 38.5  |
| Coccothrinax readii    | t | -0.921 | 4.370 | 65.1  |
| Cecropia obtusifolia   | t | -3.205 | 3.142 | 18.0  |
| Iriatea deltoidea      | t | -1.536 | 3.880 | 30.4  |
| Avicennia marina       | t | -0.974 | 3.048 | 9.7   |

Table 3b: Species with  $E > 0$

| Species              | Life form | $E$   | $S$   | $T$  |
|----------------------|-----------|-------|-------|------|
| Calochortus albus    | o         | 0.324 | 1.983 | 5.33 |
| Armeria maritima     | o         | 0.673 | 2.405 | 8.16 |
| Petrophile pulchella | s         | 0.882 | 2.349 | 6.92 |
| Banksia ericifolia   | s         | 0.986 | 2.253 | 6.26 |
| Calluna vulgaris     | s         | 1.945 | 1.690 | 3.59 |
| Euterpe edulis       | t         | 1.132 | 3.144 | 18.7 |
| Thrinax radiata      | t         | 1.265 | 3.896 | 41   |

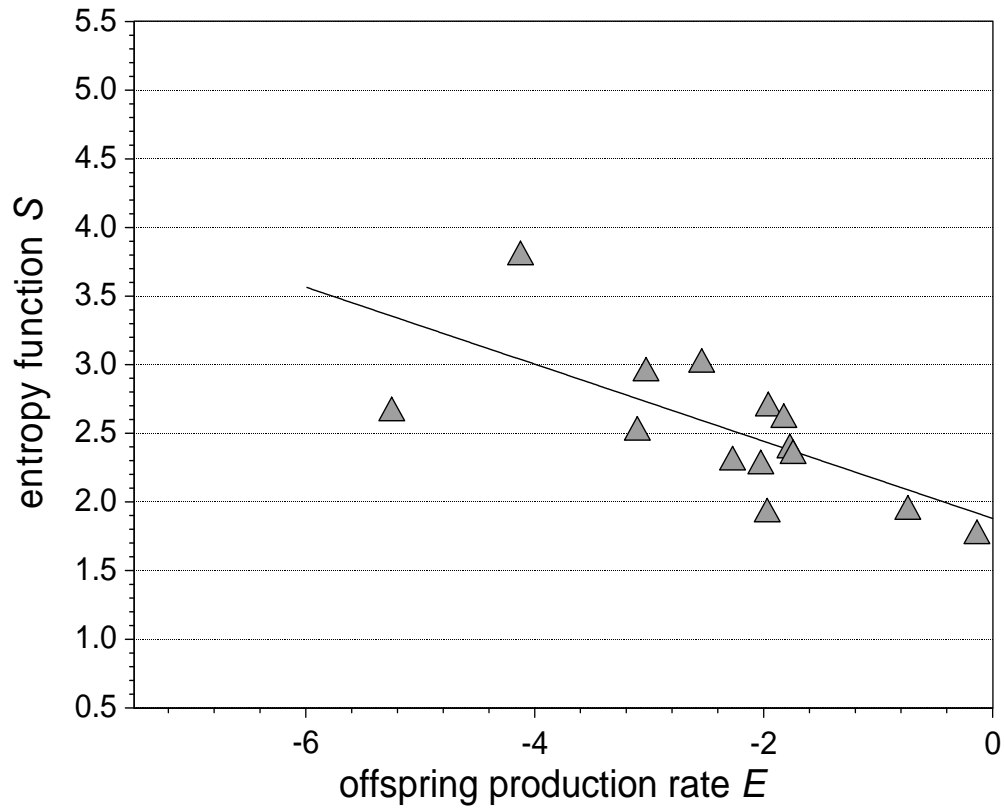

Figure 5: Relation between  $E$  and  $S$ : forest herbs (f)

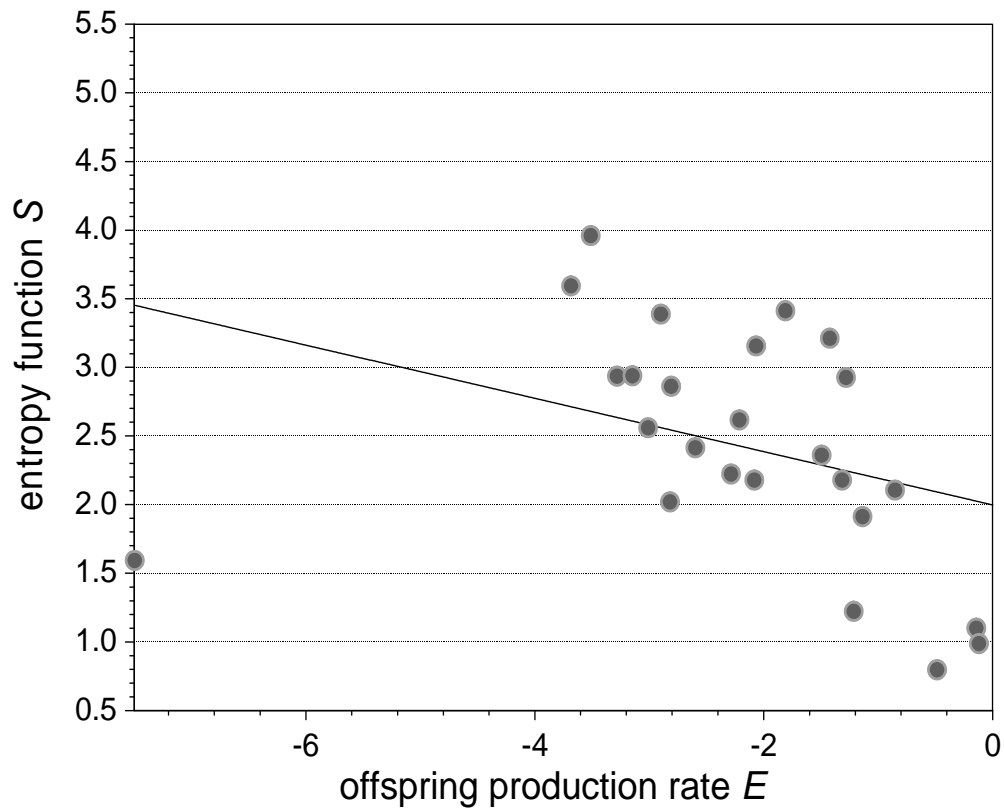

Figure 6: Relation between  $E$  and  $S$ : herbs from disturbed habitats (o)

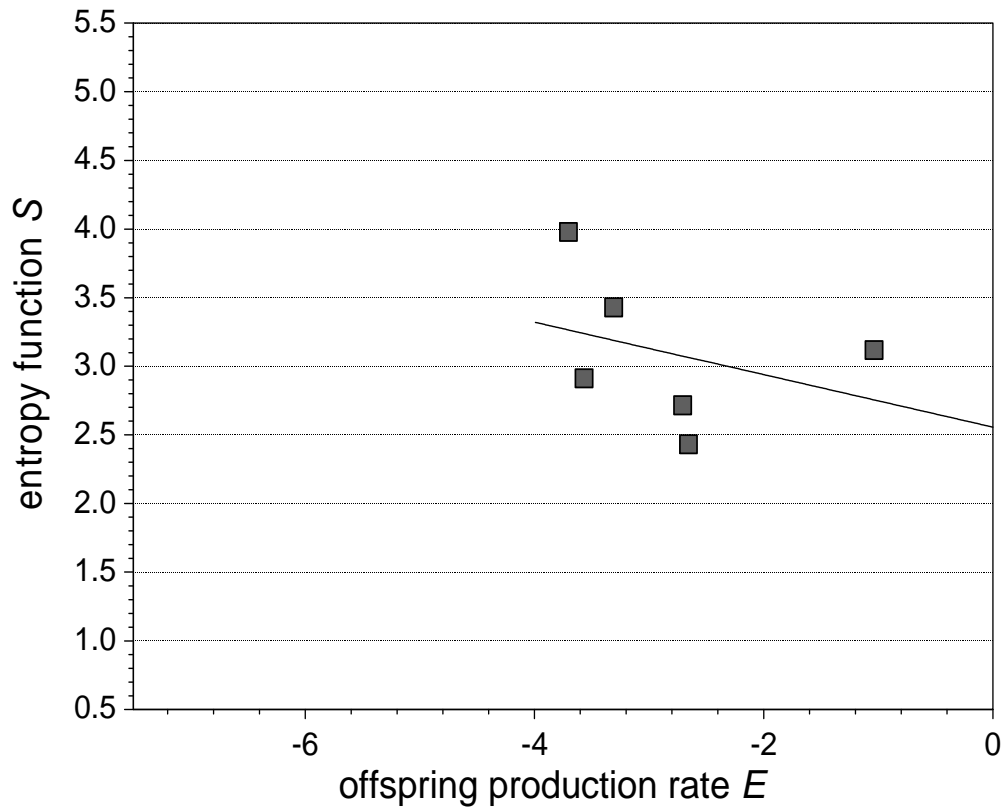

Figure 7: Relation between  $E$  and  $S$ : shrubs (s)

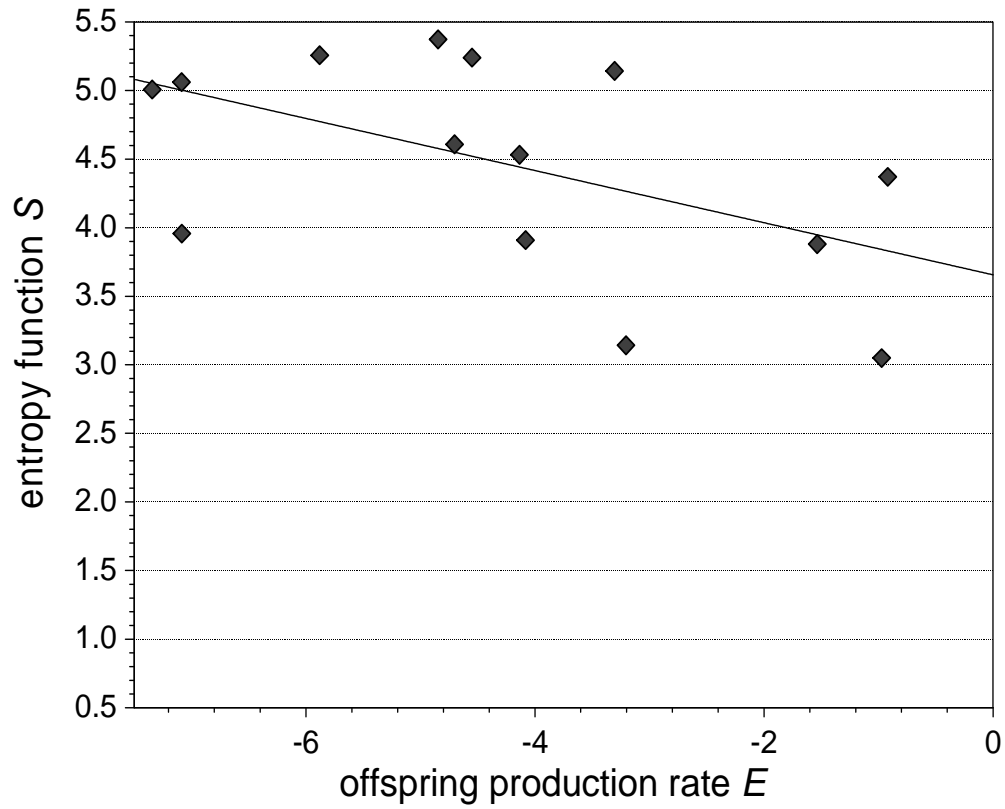

Figure 8: Relation between  $E$  and  $S$ : trees (t)
